# Supplementary material for: Complementary and alternative medicine (CAM) as part of primary health care in Germany–comparison of patients consulting general practitioners and CAM practitioners: a cross-sectional study
Source: Springer Nature journal article supplement (doi:10.1186/s12906-016-1402-8), 2016-10-24
Supplement: MOESM1 [file 10982332]

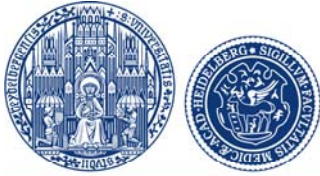

UniversitätsKlinikum Heidelberg

# KompMed Primär-Studie

## Patientenfragebogen A

Version 16.2.2012

Bitte beachten Sie beim Ausfüllen folgende **Hinweise**:

- Verwenden Sie nur Kugelschreiber.
- Machen Sie Freitextangaben bitte in Druckbuchstaben.
- Kreuzen Sie die Kästchen deutlich an:
- Bei versehentlicher Falschwahl füllen Sie bitte das entsprechende Kästchen ganz aus  und kreuzen Ihre Auswahl erneut an:

# A. Fragen zu Ihrem Gesundheitszustand

Name: \_\_\_\_\_ Telnr: \_\_\_\_\_ / \_\_\_\_\_  
Geburtsdatum: \_\_\_\_ . \_\_\_\_ . \_\_\_\_  
Straße: \_\_\_\_\_ Hausnr.: \_\_\_\_\_  
Postleitzahl: \_\_\_\_\_  
Ort: \_\_\_\_\_  
Datum der heutigen Befragung: \_\_\_\_ . \_\_\_\_ . \_\_\_\_  
Behandelnder Arzt: \_\_\_\_\_

---

**Bitte machen Sie jeweils ein Kreuz (X) auf der für Sie zutreffenden Zahl:**

- 1.) Wählen Sie bitte **ein oder zwei Beschwerden** (körperlich oder geistig), die Sie am meisten stören. Schreiben Sie diese in das dafür vorgesehene Feld. Überlegen Sie sich nun sorgfältig, wie ausgeprägt Sie jede Beschwerde in der vergangenen Woche empfunden haben und machen Sie ein Kreuz auf der dafür zutreffenden Zahl.

**Beschwerde 1:**

\_\_\_\_\_

So gut, wie es nur  
sein könnte

0

1

2

3

4

5

So schlecht, wie  
es nur sein könnte

6

**Beschwerde 2:**

\_\_\_\_\_

So gut, wie es nur  
sein könnte

0

1

2

3

4

5

So schlecht, wie  
es nur sein könnte

6

- 2.) Wählen Sie jetzt **eine Aktivität** (körperlich, sozial oder geistig), die Ihnen wichtig ist, und deren Ausübung durch Ihre Beschwerde(n) erschwert bzw. gänzlich eingeschränkt wird. Kreuzen Sie bitte an, wie ausgeprägt dies in der vergangenen Woche war.

**Aktivität:**

\_\_\_\_\_

Gar nicht  
eingeschränkt

0

1

2

3

4

5

Gänzlich  
eingeschränkt

6

### 3.) Allgemeines Wohlergehen:

Wie würden Sie Ihr allgemeines Befinden in der vergangenen Woche bewerten?

So gut, wie es nur  
sein könnte

0

1

2

3

4

5

So schlecht, wie  
es nur sein könnte

6

---

4.) Wie lange leiden Sie bereits **unter Beschwerde 1**, egal ob Sie durchgehend oder gelegentlich daran gelitten haben? Bitte kreuzen Sie an.

0-4 Wochen

4-12 Wochen

3 Monate – 1 Jahr

1 – 5 Jahre

über 5 Jahre

---

5.) Nehmen Sie **Medikamente** wegen dieser Beschwerden?

Ja

Nein

**falls JA:**

5a) Bitte schreiben Sie die Namen der Medikamente auf und wie oft Sie diese pro Tag einnehmen:

---

---

5b) Ist es wichtig für Sie, diese Medikamente zu reduzieren?

nicht wichtig

ein bisschen wichtig

sehr wichtig

keine Angabe

**falls NEIN:**

5c) Wie wichtig ist es für Sie, auch in Zukunft keine Medikamente gegen diese Beschwerde(n) zu nehmen?

nicht wichtig

ein bisschen wichtig

sehr wichtig

keine Angabe

---

6.) Sind Sie wegen dieser Beschwerde(n) schon bei einem anderen Arzt / Therapeuten gewesen?

nein

ja Wenn ja, bei einem  Facharzt für \_\_\_\_\_ (bitte eintragen)

Heilpraktiker

sonstige: \_\_\_\_\_ (bitte eintragen)

**7.) Haben Sie eine chronische Krankheit?**

**Nein**, ich leide unter keiner chronischen Erkrankung.

**Ja**, (bitte die entsprechende Erkrankung ankreuzen; Mehrfachantworten möglich)

- chronische Rückenschmerzen
- Gelenkerkrankung (Arthrose, Rheuma)
- Allergie / chronische Hauterkrankung
- Koronare Herzerkrankung / Herzschwäche
- Bluthochdruck (Hypertonie)
- Diabetes mellitus (Zuckerkrankheit)
- Asthma oder Chronische Bronchitis
- chronische Magen-Darm-Krankheit
- Depression / Angsterkrankung
- Krebserkrankung

Wenn ja, welche Krebserkrankung:

sonstige chronische Erkrankungen

Wenn ja, welche

**8.) Wieviele Medikamente nehmen Sie insgesamt ein (incl. eventueller pflanzlicher, homöopathischer Präparate)?**

keine    1-2    3-4    5-6    >7

**9.) Bitte geben Sie an, welche Aussagen Ihren heutigen Gesundheitszustand am besten beschreiben, indem Sie ein Kreuz in ein Kästchen jeder Gruppe machen.**

**a.) Beweglichkeit/Mobilität**

Ich habe keine Probleme herumzugehen

Ich habe einige Probleme herumzugehen

Ich bin ans Bett gebunden

**b.) Für sich selbst sorgen**

Ich habe keine Probleme, für mich selbst zu sorgen

Ich habe einige Probleme, mich selbst zu waschen oder mich anzuziehen

Ich bin nicht in der Lage, mich selbst zu waschen oder anzuziehen

**c.) Alltägliche Tätigkeiten (z.B. Arbeit, Hausarbeit, Familien- oder Freizeitaktivitäten)**

Ich habe keine Probleme, meinen alltäglichen Tätigkeiten nachzugehen

Ich habe einige Probleme, meinen alltäglichen Tätigkeiten nachzugehen

Ich bin nicht in der Lage, meinen alltäglichen Tätigkeiten nachzugehen

**d.) Schmerzen/Körperliche Beschwerden**

- Ich habe keine Schmerzen oder Beschwerden
- Ich habe mäßige Schmerzen oder Beschwerden
- Ich habe extreme Schmerzen oder Beschwerden

**e.) Angst/Niedergeschlagenheit**

- Ich bin nicht ängstlich oder deprimiert
- Ich bin mäßig ängstlich oder deprimiert
- Ich bin extrem ängstlich oder deprimiert

**10.) Bitte schätzen Sie Ihren Gesundheitszustand ein.**

Um Sie bei der Einschätzung, wie gut oder wie schlecht Ihr Gesundheitszustand ist, zu unterstützen, haben wir eine Skala gezeichnet, ähnlich einem Thermometer. Der best denkbare Gesundheitszustand ist mit einer "100" gekennzeichnet, der schlechteste mit "0".

Wir möchten Sie nun bitten, auf dieser Skala zu kennzeichnen, wie gut oder schlecht Ihrer Ansicht nach Ihr persönlicher Gesundheitszustand heute ist.

*Bitte markieren Sie dazu das Thermometer an der für Sie passenden Stelle mit einem Kreuz.*

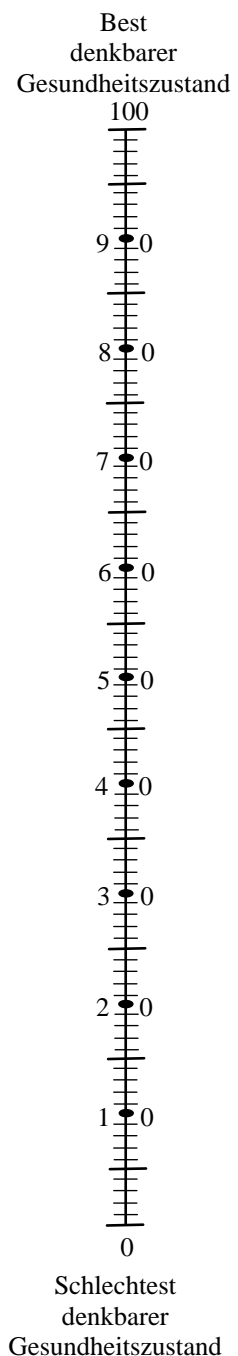

## B. Fragen zu Ihrem Arzt und zur Konsultation

Die folgenden Fragen beziehen sich alle auf den Arzt, bei dem Sie heute waren.

### 11.) Wie lange kennen Sie Ihren Arzt bereits?

- Es ist meine erste Konsultation  
 weniger als 1 Jahr       seit 1-5 Jahren  
 seit 5-10 Jahren       länger als 10 Jahre

### 12.) Wie oft waren Sie (abgesehen vom heutigen Besuch) innerhalb der letzten 12 Monate bei Ihrem Arzt?

- nie       weniger als 5-mal       5 bis 10-mal       mehr als 10-mal

### 13.) Ich kann mit meinem Arzt offen sprechen.

- stimme überhaupt nicht zu                                                stimme voll zu

### 14.) Ich habe volles Vertrauen in meinen Arzt.

- stimme überhaupt nicht zu                                                stimme voll zu

### 15.) Wie wohl fühlen Sie sich in der Praxis insgesamt (Atmosphäre, Praxisteam, Ausstattung u.a.)?

- überhaupt nicht wohl                                                sehr wohl

### 16.) Würden Sie Ihren Arzt Ihrer Familie / Ihren Freunden empfehlen?

- überhaupt nicht empfehlen                                                in jedem Fall empfehlen

### 17.) Wie gestresst schätzen Sie Ihren Arzt heute ein?

Bitte kreisen Sie am Thermometer die Zahl ein (0-10), die das am Besten beschreibt.

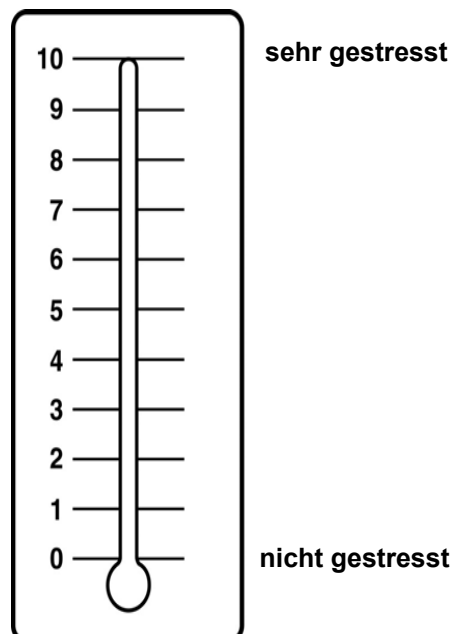

#### Kontakt:

PD Dr. med. Stefanie Joos, Universitätsklinikum Heidelberg, Abteilung Allgemeinmedizin und Versorgungsforschung  
Voßstr. 2, 69115 Heidelberg, Telefon: 06221/56-6263, Fax: 06221/56-1972

**Bitte bewerten Sie die folgenden Aussagen in Bezug auf Ihre heutige Konsultation:**

|                                                                                                                                                                                                                                                                | trifft überhaupt<br>nicht zu |                          |                          |                          | trifft voll<br>zu        | keine<br>Angabe          |
|----------------------------------------------------------------------------------------------------------------------------------------------------------------------------------------------------------------------------------------------------------------|------------------------------|--------------------------|--------------------------|--------------------------|--------------------------|--------------------------|
| <b>18.) Hat sich der Arzt so verhalten, dass Sie sich in seiner Nähe wohlfühlen konnten?</b> (Er war freundlich, warmherzig und respektvoll, aber nicht kühl oder kurz angebunden.)                                                                            | <input type="checkbox"/>     | <input type="checkbox"/> | <input type="checkbox"/> | <input type="checkbox"/> | <input type="checkbox"/> | <input type="checkbox"/> |
| <b>19.) Hat der Arzt Sie Ihre eigene (Krankheits-) Geschichte erzählen lassen?</b> (Er gab Ihnen Zeit, Ihre Krankheit ausführlich zu beschreiben. Er hat Sie dabei nicht unterbrochen oder abgelenkt.)                                                         | <input type="checkbox"/>     | <input type="checkbox"/> | <input type="checkbox"/> | <input type="checkbox"/> | <input type="checkbox"/> | <input type="checkbox"/> |
| <b>20.) Hat der Arzt Ihnen wirklich zugehört?</b> (Er hat dem, was Sie gesagt haben, seine volle Aufmerksamkeit geschenkt und dabei nicht auf seine Unterlagen oder auf den Computer geschaut.)                                                                | <input type="checkbox"/>     | <input type="checkbox"/> | <input type="checkbox"/> | <input type="checkbox"/> | <input type="checkbox"/> | <input type="checkbox"/> |
| <b>21.) Hat sich der Arzt für Sie als Mensch und für Ihr Umfeld interessiert?</b> (Er kannte oder fragte nach wichtigen Einzelheiten Ihres Lebens oder Ihrer persönlichen Situation und hat Sie nicht wie eine „Nummer“ behandelt.)                            | <input type="checkbox"/>     | <input type="checkbox"/> | <input type="checkbox"/> | <input type="checkbox"/> | <input type="checkbox"/> | <input type="checkbox"/> |
| <b>22.) Hat der Arzt Ihre Sorgen wirklich verstanden?</b> (Er konnte Ihnen das Gefühl vermitteln, dass er Ihre Sorgen genau verstanden hat. Er hat dabei nichts übersehen und ist über nichts hinweggegangen.)                                                 | <input type="checkbox"/>     | <input type="checkbox"/> | <input type="checkbox"/> | <input type="checkbox"/> | <input type="checkbox"/> | <input type="checkbox"/> |
| <b>23.) War der Arzt fürsorglich und hat er Mitgefühl gezeigt?</b> (Er hat sich aufrichtig um Sie gekümmert und sich Ihnen gegenüber menschlich gezeigt. Dabei war er nicht gleichgültig oder distanziert.)                                                    | <input type="checkbox"/>     | <input type="checkbox"/> | <input type="checkbox"/> | <input type="checkbox"/> | <input type="checkbox"/> | <input type="checkbox"/> |
| <b>24.) Hat der Arzt Ihnen Mut gemacht?</b> (Er hatte eine zuversichtliche Einstellung. Er war ehrlich, aber gegenüber Ihren Problemen nicht negativ eingestellt.)                                                                                             | <input type="checkbox"/>     | <input type="checkbox"/> | <input type="checkbox"/> | <input type="checkbox"/> | <input type="checkbox"/> | <input type="checkbox"/> |
| <b>25.) Hat der Arzt Ihnen alles verständlich erklärt?</b> (Er hat Ihre Fragen vollständig beantwortet und alles eindeutig erklärt. Er gab Ihnen ausreichende Informationen und hat Sie nicht im Unklaren gelassen.)                                           | <input type="checkbox"/>     | <input type="checkbox"/> | <input type="checkbox"/> | <input type="checkbox"/> | <input type="checkbox"/> | <input type="checkbox"/> |
| <b>26.) Hat der Arzt Ihnen geholfen, einen Weg zu finden mit Ihrer Krankheit umzugehen?</b> (Er hat gemeinsam mit Ihnen erkundet, wie Sie selbst Ihren Gesundheitszustand verbessern können. Dabei hat er Sie ermutigt, anstatt Sie zu belehren.)              | <input type="checkbox"/>     | <input type="checkbox"/> | <input type="checkbox"/> | <input type="checkbox"/> | <input type="checkbox"/> | <input type="checkbox"/> |
| <b>27.) Hat der Arzt mit Ihnen zusammen einen Behandlungsplan erstellt?</b> (Er hat mit Ihnen die Behandlungsmöglichkeiten diskutiert und Sie in Entscheidungen – soweit Sie dies gewünscht haben - einbezogen. Dabei hat er Ihre Sichtweise nicht ignoriert.) | <input type="checkbox"/>     | <input type="checkbox"/> | <input type="checkbox"/> | <input type="checkbox"/> | <input type="checkbox"/> | <input type="checkbox"/> |

**Kontakt:**

PD Dr. med. Stefanie Joos, Universitätsklinikum Heidelberg, Abteilung Allgemeinmedizin und Versorgungsforschung  
Voßstr. 2, 69115 Heidelberg, Telefon: 06221/56-6263, Fax: 06221/56-1972

**28.) Wie zufrieden sind Sie insgesamt mit der heutigen Konsultation?**

überhaupt nicht zufrieden sehr zufrieden

**29.) Wie lange hat Ihre heutige Konsultation gedauert? (Bitte schätzen Sie.)**

weniger als 5 Minuten  40 bis 60 Minuten

5 bis 10 Minuten  länger als 60 Minuten

10 bis 15 Minuten

15 bis 20 Minuten

20 bis 40 Minuten

**30.) Die Länge der Konsultation war ....**

... genau richtig

... zu kurz

... zu lang

**31.) Fühlen Sie sich durch Ihren heutigen Besuch beim Arzt in der Lage ...**

*Bitte kreuzen Sie in jeder Zeile nur eine Antwortmöglichkeit an!*

|                                                                                      | viel besser              | etwas besser             | unverändert              | etwas schlechter         | viel schlechter          | keine Angabe             |
|--------------------------------------------------------------------------------------|--------------------------|--------------------------|--------------------------|--------------------------|--------------------------|--------------------------|
| <b>a.) ... mit Ihrem Leben umzugehen?</b>                                            | <input type="checkbox"/> | <input type="checkbox"/> | <input type="checkbox"/> | <input type="checkbox"/> | <input type="checkbox"/> | <input type="checkbox"/> |
| <b>b.) ... Ihre Krankheit zu verstehen?</b>                                          | <input type="checkbox"/> | <input type="checkbox"/> | <input type="checkbox"/> | <input type="checkbox"/> | <input type="checkbox"/> | <input type="checkbox"/> |
| <b>c.) ... mit Ihrer Krankheit umzugehen?</b>                                        | <input type="checkbox"/> | <input type="checkbox"/> | <input type="checkbox"/> | <input type="checkbox"/> | <input type="checkbox"/> | <input type="checkbox"/> |
| <b>d.) ... selbst etwas für Ihre Gesundheit/ gegen Ihre Krankheit tun zu können?</b> | <input type="checkbox"/> | <input type="checkbox"/> | <input type="checkbox"/> | <input type="checkbox"/> | <input type="checkbox"/> | <input type="checkbox"/> |

|                                                                                | viel mehr                | etwas mehr               | unverändert              | etwas weniger            | viel weniger             | keine Angabe             |
|--------------------------------------------------------------------------------|--------------------------|--------------------------|--------------------------|--------------------------|--------------------------|--------------------------|
| <b>e.) ... zuversichtlich in Bezug auf Ihre Krankheit/ Gesundheit zu sein?</b> | <input type="checkbox"/> | <input type="checkbox"/> | <input type="checkbox"/> | <input type="checkbox"/> | <input type="checkbox"/> | <input type="checkbox"/> |
| <b>f.) ... sich selbst zu helfen</b>                                           | <input type="checkbox"/> | <input type="checkbox"/> | <input type="checkbox"/> | <input type="checkbox"/> | <input type="checkbox"/> | <input type="checkbox"/> |

**Kontakt:**



## C. Fragen zu Ihrer Person

32.) Wie alt sind Sie?     Jahre

33.) Wie ist Ihr Geschlecht?

männlich

weiblich

34.) Wo ist Ihr Wohnort?

Großstadt (ab 100.000 EW)  Kleinstadt (bis 100.000 EW)  Ländliches Umfeld (bis 15.000 EW)

35.) Welchen Familienstand haben Sie?

ledig

verheiratet / in Partnerschaft

geschieden / getrennt lebend

verwitwet

36.) Wie leben Sie?

alleine lebend

mit Partner/in lebend

sonstiges

37.) Haben Sie ein Kind / Kinder?

ja

nein

38.) Welches ist Ihr höchster Schulabschluss (bitte nur eine Angabe)?

kein Schulabschluss

Hauptschulabschluss / Volksschulabschluss

Realschulabschluss (Mittlere Reife)

Abitur / (Fach) Hochschulreife

sonstiger Abschluss, und zwar:

39.) Sind Sie derzeit erwerbstätig?

nein

ja

Wenn ja,  .. mit mehr als 40 Stunden pro Woche

.. mit 20 - 40 Stunden pro Woche

.. mit weniger als 20 Stunden pro Woche

40.) Falls Sie nicht erwerbstätig sind, zu welcher Gruppe gehören Sie?

Schüler/in

Student/in

Hausfrau/Hausmann

Rentner/in, Pensionär/in

arbeitslos

sonstiges und zwar:

41.) Wo sind Sie geboren?

in Deutschland

in einem anderen Land

42.) Welche Sprache sprechen Sie überwiegend zu Hause?

deutsch

eine andere Sprache

keine Angabe möglich

Kontakt:

PD Dr. med. Stefanie Joos, Universitätsklinikum Heidelberg, Abteilung Allgemeinmedizin und Versorgungsforschung  
Voßstr. 2, 69115 Heidelberg, Telefon: 06221/56-6263, Fax: 06221/56-1972
